# Supplementary material
Source: Springer Nature journal article supplement (https://www.springermedizin.de/resource/supplementary/12968_2013_3939_MOESM1_ESM.pdf/9584910)

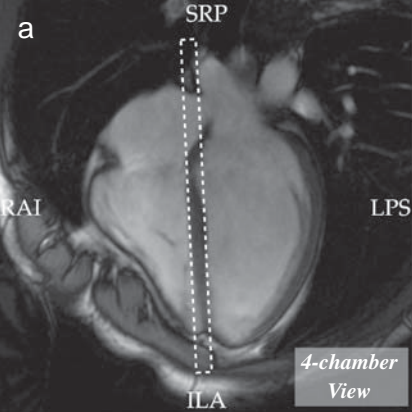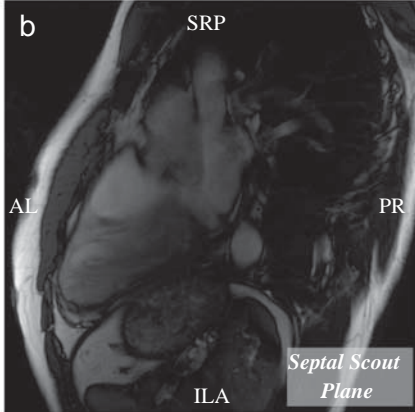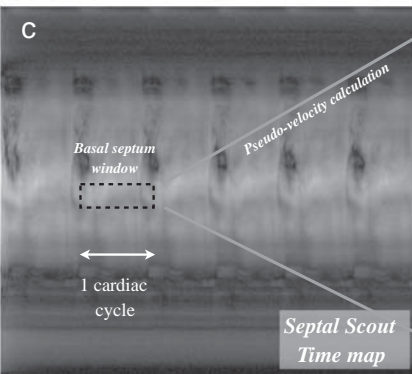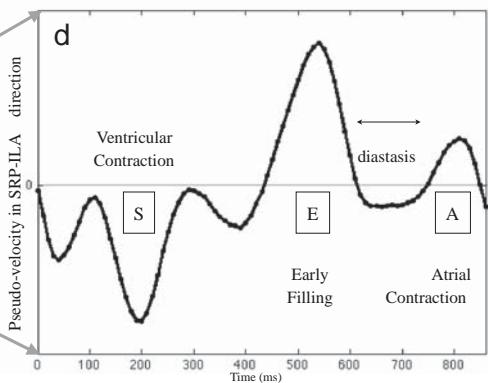

### Orientation Legend

L: left                      A: anterior                      S: superior  
 R: right                     P: posterior                     I: inferior

Supplement: MOESM1 [file 9584910]
